1 **Title: Plasticity and Artificial Selection for Developmental Mode in a**  
2 **Poecilogonous Sea Slug**

3

4 **Keywords: lecithotrophy, planktotrophy, plasticity, sacoglossan, larvae, salinity**

5 **word count: 6422**

6 **submission type: Article**

7

8 **Author: Serena A. Caplins**

9 **Affiliations: Department of Evolution and Ecology, Center for Population Biology, University**  
10 **of California, Davis, Davis, California 95616**

11 **Abstract**

12 Developmental mode describes the means by which larvae are provisioned with the nutrients they need  
13 to proceed through development and typically results in a trade-off between offspring size and number.  
14 The sacoglossan sea slug *Alderia willowi* exhibits intraspecific variation for developmental mode (=   
15 poecilogony) that is environmentally modulated with populations producing more yolk-feeding  
16 (lecithotrophic) larvae during the summer, and more planktonic feeding (planktotrophic) larvae in the  
17 winter. I found significant family level variation in the reaction norms between 17 maternal families of *A.*  
18 *willowi* when reared in low (16 ppt) versus high (32 ppt) salinity. I documented a significant response to  
19 selection for lecithotrophic larvae, the proportion of which increased 32% after three generations of  
20 selection in high salinity, and 18% after 2 generations in low salinity (realized heritability:  $0.365 \pm 0.024$ ).  
21 The slope of the reaction norm was maintained following one generation of selection for lecithotrophy  
22 and one generation of selfing. The rapid response to selection favoring one developmental mode may  
23 speak to the rarity of intraspecific variation for developmental mode, which could fix for one mode over  
24 another much more readily than has generally been assumed from studies of less plastic organisms.

25 **Introduction**

26 Marine invertebrates exhibit astonishing levels of morphological diversity in their adult forms.  
27 Their larvae, however, can be broadly grouped into a few developmental modes that while also  
28 morphologically variable, share many functional similarities within and between phyla (Thorson 1950;  
29 Strathmann 1978, Collin and Moran 2017). The inferred ancestral state for many phyla is planktotrophic  
30 development, involving the production of many relatively small larvae that feed in the plankton prior to  
31 settlement and metamorphosis to the adult form (Strathmann 1978; McHugh and Rouse 1998).  
32 Lecithotrophy (non-feeding) is the most common alternative to planktotrophic development, in which a  
33 few relatively large larvae contain substantial amounts of yolk, such that they do not need to feed in the  
34 plankton before metamorphosis (McEdward and Janies 1997; Marshall et al 2017). Both planktotrophy

35 and lecithotrophy are found in all invertebrate bilaterian phyla and are widespread phylogenetically  
36 (Ruppert 2004). Numerous studies suggest that the evolution of developmental mode is primarily uni-  
37 directional (from planktotrophy to lecithotrophy), though reversions or convergent re-evolution of  
38 planktotrophy from lecithotrophy are possible (Marshall, Raff, and Raff 1994; Kupriyanova, Macdonald,  
39 and Rouse 2006; Collin and Miglietta 2008). Modifications to developmental mode can evolve rapidly (<  
40 20 kya, Puritz et al. 2012), and frequently in marine invertebrates with closely related sister species  
41 often displaying alternate modes of development (Krug et al. 2015; Jeffery, Emlet, and Littlewood 2003).  
42 These patterns have intrigued evolutionary biologists for decades, as we ask how does lecithotrophy  
43 evolve? Are there many or few genetic changes in the evolution of lecithotrophy? Are there  
44 environmental factors that select for one developmental mode over another?

45       Phenotypic plasticity, the ability of a single genotype to produce multiple phenotypes  
46 depending on the environment, is a common adaptation to spatial or temporal environmental  
47 heterogeneity (Via et al. 1995). Yet, the evolutionary role of plasticity is highly context-dependent,  
48 sometimes fueling evolution by moving the mean phenotype in the direction favored by selection, and  
49 other times hindering evolution through the lack of a genetic response to selection on a variable  
50 phenotype (see Pfennig et al. 2010). Within a generation, phenotypic variation can shift after a selective  
51 event (e.g., a sudden change in environment, or predation), but the *response* to selection in the  
52 following generation reveals whether there is sufficient genetic variation underlying phenotypic  
53 variation for evolution to occur (Falconer 1960). Selection experiments can thus reveal the extent to  
54 which there is heritable genetic variation for a plastic phenotype and are a powerful means of exploring  
55 the potential for adaptive evolution under highly controlled environmental conditions, simplifying the  
56 study of environmentally influenced quantitative traits (Scheiner 2002; Fuller, Baer, and Travis 2005).  
57 Selection experiments can also reveal the effect of specific environmental factors, which may influence

58 the response to selection by either revealing or masking ‘cryptic’ genetic variants (Falconer 1960; Paaby  
59 and Rockman 2014).

60 In this paper, I examine the role of environmentally modulated plasticity in the evolution of  
61 larval developmental mode in a marine gastropod that exhibits phenotypic plasticity for developmental  
62 mode. Species that are polymorphic for the type of larvae they produce provide a novel means of  
63 addressing the evolution of macro-evolutionary patterns in a micro-evolutionary framework. This  
64 polymorphism, termed *poecilogony*, occurs when a single species produces both planktotrophic and  
65 lecithotrophic larvae (Knott and McHugh 2012). Poecilogony typically manifests as either variation for  
66 developmental mode within a population, or variation between populations (Collin 2012).  
67 Poecilogonous species provide a clear way to explore the selection pressures and corresponding genetic  
68 and transcriptomic changes that drive the evolution of developmental mode. Poecilogonous species are  
69 key to understanding the *minimum number* of genetic changes that underlie developmental mode, as  
70 they provide a view into the specific alternative developmental pathways that give rise to these modes  
71 in the absence of interspecific differences (Alan and Pernet 2007, Knott and McHugh 2012; Zakas et al.  
72 2018).

73 There is only one poecilogonous species that exhibits environmental modulation in its  
74 expression of developmental mode, the sea slug *Alderia willowii*, where egg size and number are  
75 negatively correlated and bimodally distributed, with individual clutches consisting of either many small  
76 eggs that develop into planktotrophic larvae, or relatively few large eggs that can successfully  
77 metamorphose into juvenile slugs without feeding (Krug 1998, 2001). The relative frequency of clutches  
78 containing either planktotrophically or lecithotrophically developing eggs varies seasonally (Ellingson  
79 and Krug 2016) and in response to starvation (Krug 1998) or lab conditions (Krug 2007). In field  
80 populations, individuals produce a greater proportion of clutches containing a few large eggs with  
81 lecithotrophic development during the summer months, and more clutches with many small,

82 planktotrophically developing eggs in the winter (Krug et al. 2012). Lab populations show a similar  
83 pattern, with conditions that mimic summer resulting in more lecithotrophically developing embryos  
84 (Krug et al. 2012). Despite these seasonal trends that are consistent across years, lab and field  
85 populations exhibit variation in the proportion of lecithotrophic clutches produced seasonally and  
86 geographically (Patrick J. Krug et al. 2007; Patrick J. Krug, Gordon, and Romero 2012).  
87 Herein I examine the extent of genetic variation and environmental influence on developmental mode  
88 in maternal families of *A. willowi*. I measured the response to selection for lecithotrophy and evaluate  
89 whether one generation of selection affects the direction or degree of plasticity.

90

## 91 **Methods**

### 92 **Study system**

93 An *Alderia willowi* egg mass consists of dozens to hundreds of eggs strung together and surrounded by a  
94 thick jelly like substance (Figure 1A). Each individual egg is surrounded by a transparent capsule the  
95 diameter of which scales closely with egg diameter (Figure 1B-D). In *A. willowi*, egg size is correlated  
96 with developmental mode large eggs (Mean  $\pm$  SD: 105  $\pm$  5  $\mu$ m) develop into lecithotrophic larvae that  
97 metamorphose into juvenile slugs in  $\sim$ 5 days, whereas small eggs (Mean  $\pm$  SD: 68  $\pm$  4  $\mu$ m) give rise to  
98 planktotrophic larvae that only become metamorphically competent after 30 days of feeding on  
99 planktonic algae (Krug 1998). Both size classes of larvae can feed on phytoplankton, but the larger,  
100 lecithotrophically developing larvae do not need to feed to complete metamorphosis and occasionally  
101 develop into the juvenile stage while still encapsulated in their egg capsule, by-passing a swimming  
102 stage altogether (Krug 2001; Botello and Krug 2006). Infrequently, individual *A. willowi* produce mixed-  
103 egg clutches containing both lecithotrophic and planktotrophic embryos (Krug 1998). In these egg-  
104 masses, larvae with a larval shell diameter  $>$  160  $\mu$ m exhibit lecithotrophic development, whereas  
105 smaller larvae are all planktotrophic (Krug 1998).

106 Populations of *A. willowi* are found on mudflats in estuarine environments and can be extremely  
107 variable in density, from several dozen individuals/m<sup>2</sup> to 1300 slugs/m<sup>2</sup> (Garchow 2010). Individuals are  
108 typically polyandrous, with multiple matings via hypodermic insemination (Smolensky, Romero, and  
109 Krug 2009). At low densities, however, *A. willowi* exhibits “delayed selfing” (Smolensky, Romero, and  
110 Krug 2009). Self-fertilized egg masses are occasionally incompletely fertilized and *A. willowi* will  
111 continually deposit unfertilized or partially fertilized egg masses when reared in isolation (personal  
112 obs., Smolensky, Romero, and Krug 2009).

113

#### 114 **Effect of salinity on developmental mode**

115 Adult *Alderia willowi* were collected from three sites in CA: Tomales Bay (20 June 2017  
116 [38°06'59"N 122°51'16"W], Mill Valley (12 September 2017 [37°52'55"N 122°31'03"W] and Long Beach  
117 (14 September 2017, provided by Patrick Krug [33.73 N, 118.203 W]). I selected lecithotrophic egg  
118 masses from 17 adult slugs (Tomales Bay: 7; Mill Valley: 5; Long Beach: 5), from which the embryos  
119 constituted 17 maternal families consisting of unknown mixtures of full- or half-sibs. Embryos from each  
120 family were hatched and reared to the newly metamorphosed juvenile stage in 32 ppt filtered sea water  
121 at room temperature. Embryos were not provided with planktonic algae, and instead relied on their yolk  
122 stores to complete development. Once slugs were at the crawling juvenile stage, I haphazardly selected  
123 individuals from each maternal family to either the low (16 ppt) or high (32 ppt) salinity treatment. I  
124 placed 24-36 juvenile slugs in each salinity treatment per maternal family. Slugs were reared individually  
125 in 12-well culture dishes with a 5 ml volume per well and on a 14L:10D light cycle at room temperature  
126 (22 ± 2 °C). I covered each culture plate with plastic wrap that has a water-resistant adhesive on one side  
127 to keep slugs in their respective wells. Three times weekly, I fed slugs freshly field collected algae  
128 (*Vaucheria longicaulis*), carried out 50% water changes, and checked for newly deposited egg masses.  
129 Once slugs reached maturity and began laying egg masses, I photographed each egg mass using a Nikon

130 CoolPix P7100 on a Wild Heerbrugg dissecting microscope at 50X magnification. I measured the  
131 diameter of three to six egg capsules which surround each individual egg in Image J (v1.52). For every  
132 egg mass that contained eggs that had yet to cleave, I measured the diameter of three to six eggs in  
133 addition to measuring the egg-capsule diameter.

134 As egg size can only be accurately measured prior to embryonic cleavage, and thus within the  
135 first 1-2 hours post oviposition, I used egg-capsule size as a proxy for developmental mode. I categorized  
136 developmental mode according to egg capsule size in a clutch/egg mass, assuming that egg capsules  $\geq$   
137 150  $\mu\text{m}$  develop lecithotrophically (Krug 1998). I used an R script to classify which egg masses were  
138 “mixed” based on egg capsule measurements. I verified these “mixed” egg masses through examination  
139 of the egg mass images. To explore the relationship between egg diameter and egg capsule diameter I  
140 plotted the mean per egg mass of egg diameter against the mean per egg mass of egg capsule diameter  
141 (Figure 1).

142

### 143 **Analysis of genetic variance and heritability**

144 Models of quantitative genetics use population pedigree information to estimate genetic variance and  
145 heritability. Standard models of quantitative genetics assume traits have normal distributions; however,  
146 many traits are non-normally distributed (Hadfield and Others 2010). Generalized linear mixed models  
147 (GLMM) make use of a latent variable ( $\ell$ ) rather than the observed response, and in simulated data  
148 provide a better fit for binary traits than parent-offspring regression (de Villemereuil 2012). The latent  
149 variable of GLMMs incorporates non-normal trait distributions in quantitative genetics models. In this  
150 paper, the model takes the form below for each individual ( $i$ ):

$$151 \quad l_i = \mu + a_i + s_k + m_i + e_i,$$

152 where  $\mu$  is the mean phenotype in the population,  $a$  is the breeding value,  $s$  is the effect of salinity (on  $k$   
153 levels, low or high),  $m$  is the maternal effect of each maternal family, and  $e$  is the error term. Salinity and  
154 maternal effects are input in the model as random effects.

155 I tested the effect of salinity on egg-mass type with the response either as a continuous variable  
156 with a gaussian distribution for egg-capsule size, or as a binary variable for developmental mode (e.g.,  
157 lecithotrophy = 1, planktotrophy = 0). For the binary analysis, I assumed that egg-capsules  $> 150 \mu\text{m}$   
158 contained eggs that developed lecithotrophically, and those capsules  $< 150 \mu\text{m}$  developed  
159 planktotrophically and was likewise analyzed as a threshold trait (i.e., a quantitative trait with discrete  
160 expression, see Roff 1994). Because the binary trait (developmental mode) is derived from the  
161 continuous trait (egg capsule size), I performed each analysis separately and not as a multivariate  
162 analysis. A GLMM requires a probit link-function to go from the latent Gaussian variable to the observed  
163 response variable. In the case of a threshold response this takes the form:  $P(y_i^{0,1} = 1) = \text{probit}^{-1}(\ell_i)$ . The  
164 link function for the response of egg capsule size took the standard form for a gaussian response  
165 variable (see de Villemereuil 2018). The models were run in the R package *MCMCglmm* (Hadfield 2010).  
166 I specified priors for the gaussian model (egg capsule size) as a normal distribution with mean = zero and  
167 a small variance (1), and for the threshold model as a normal distribution with mean=zero and a large  
168 variance (1000), as described in de Villemereuil (2018). All analyses were performed in the R  
169 environment (v3.5.1) and the code used along with all the data presented in this paper are available on  
170 github (SerenaCaplins/GXE\_A.willowi).

171

## 172 **Broad sense heritability**

173 Heritability for threshold traits can be measured on two scales, the observed non-normally distributed  
174 phenotypic scale, and the normally distributed un-observed *liability* (Falconer 1960, de Villemereuil



175 2018). I used the R package *QGglimm* (de Villemereuil 2018) to calculate heritability on both the  
176 observed and liability scale for developmental mode, and on just the observed scale for egg-capsule  
177 diameter. I analyzed developmental mode as a binary trait (lecithotrophy = 1, planktotrophic = 0) in an  
178 MCMCglimm model set for a “threshold” distribution for 500,000 iterations with a burn-in phase of 3000  
179 and a thinning interval of 10.

180

### 181 **Genetic correlation**

182 Falconer (1960) noted that a phenotype produced in two environments could be viewed as two separate  
183 phenotypes, and thus a genetic correlation can be calculated between the two. This correlation can be  
184 used to determine the degree to which a phenotypic response is influenced by the environment, where  
185 a perfect correlation (= 1) between environments indicates zero environmental influence. This  
186 correlation also provides a prediction for how a given phenotype may respond to selection in a given  
187 environment (Falconer 1952). I used the family level proportion of lecithotrophic egg-masses produced  
188 in low and high salinity to evaluate the genetic correlation between salinities (see Via 1984; Roff 1996).

189

### 190 **Selection for lecithotrophy in low and high salinity**

191 To evaluate the response to selection for lecithotrophy, I selected egg masses containing large eggs for  
192 three generations. The larvae from selected egg masses were at no time fed planktonic algae, and thus  
193 all that survived to the juvenile stage were lecithotrophic in their development. I reared slugs in their  
194 respective maternal salinities (low or high) each generation. The  $S_1$  and  $S_2$  generations were the product  
195 of self-fertilization, because the hermaphroditic slugs were raised in isolation. Slugs were reared in 12-  
196 well cell-culture plates, which were covered with plastic wrap as described above. I fed adult and

197 juvenile slugs *V. longicaulis* and changed their water three times weekly. The parental generation uses  
198 data pooled from two experiments with 189 slugs from 17 families in low and 244 slugs from 17 families  
199 in high salinity. Data for the S1 and S2 generations were all collected concurrently using slugs from the  
200 parental generation that were collected from Long Beach and Mill Valley. A selection experiment was not  
201 performed on slugs from Tomales Bay and thus only data for a parental generation exists for this site. I  
202 measured egg capsule size for five capsules per egg mass in ImageJ (v1.52a). I calculated realized  
203 heritability on developmental mode using the breeder's equation ( $R = h^2S$ ) modified for a threshold  
204 response using a probit transformation to translate the proportion of individuals expressing the trait of  
205 interest to a mean value for that trait (Walsh and Lynch 2018).

206

### 207 **Selection and the reaction norm**

208 To evaluate whether the slope of the reaction norm changes following selection lecithotrophy, I reared  
209 slugs from the S<sub>1</sub> generation from two of the sites mentioned above (Mill Valley and Long Beach) in  
210 either their maternal salinity or the alternate high or low salinity. Mill Valley and Long Beach are the  
211 northern and central range sites for *A. willowi*, respectively, and may be different in their response to  
212 salinity due to differences in seasonal annual rainfall (Garchow 2010). Fifty percent of every clutch was  
213 reared in either high or low salinity, as described previously. I measured egg capsule size for three to six  
214 egg capsules per egg mass in ImageJ (v1.52a). I tested the significance of the parental reaction norm  
215 against the reaction norm after selection using a linear model with the response egg capsule diameter  
216 against the predictors salinity and generation (pre or post selection).

217

### 218 **Results**

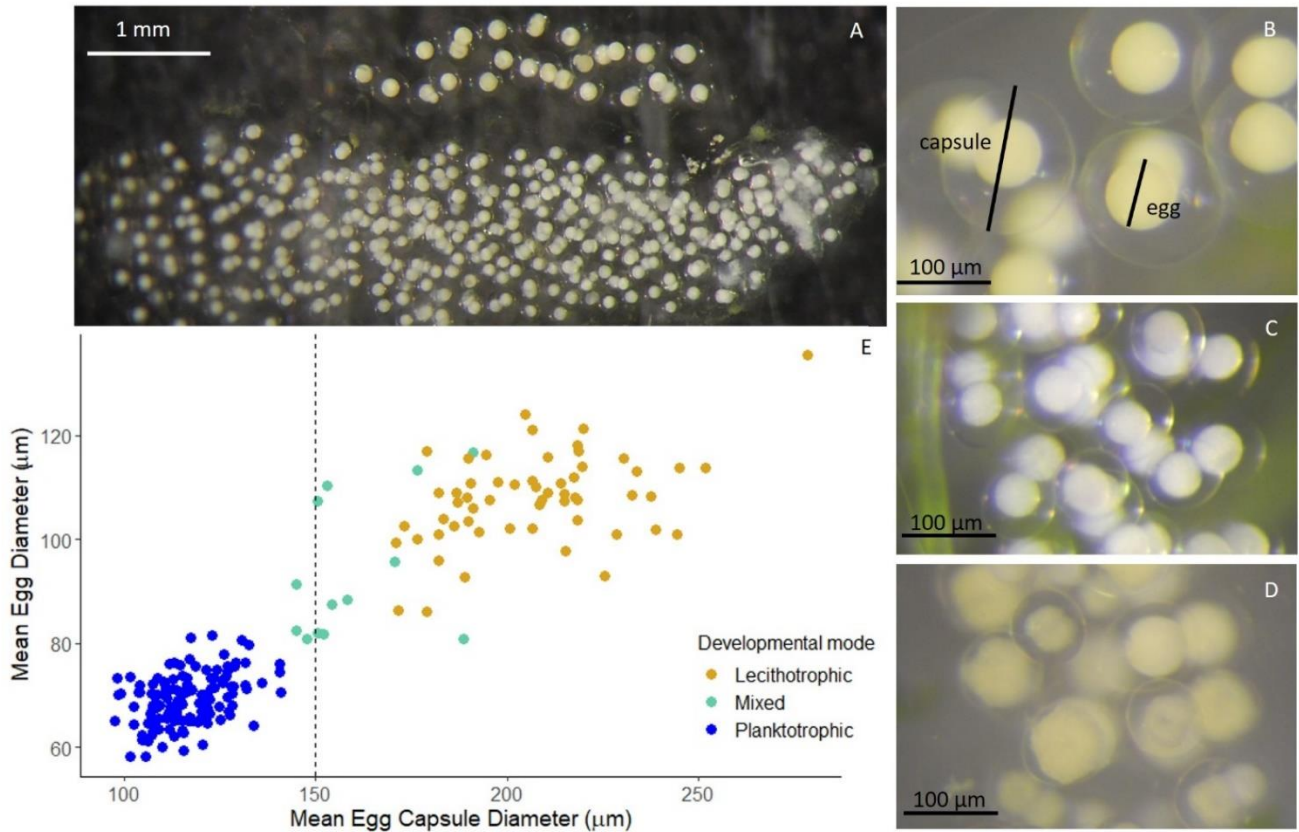

219

220 **Figure 1.** The upper egg mass in A) is a lecithotrophic egg mass, below which is a planktotrophic egg mass (10X  
221 magnification). Egg masses at increased magnification (50X) B) Lecithotrophic, C) Planktotrophic, and D) Mixed  
222 (planktotrophic and lecithotrophic, pictured in the gastrula stage) egg masses. A scatterplot of the relationship  
223 between mean egg diameter and mean egg capsule diameter calculated per egg mass is shown in E for a subset of  
224 the total egg masses measured in this study (i.e., 195 egg masses from 123 individuals).

225

## 226 **Effect of salinity on developmental mode**

227 Egg capsule size closely predicts egg size, and egg size is a proxy for developmental mode (Figure 1, Krug

228 1998). Egg capsule size and egg size can be measured on a continuous scale, but both are bimodally

229 distributed as shown in measurements of the mean egg diameter and mean egg capsule diameter per

230 egg mass for 195 egg masses from 123 individuals in low (N = 70) and high (N = 125) salinity (Figure 1E).

231 Egg size has a smaller standard deviation than egg capsule size (egg diameter SD = 0.017, egg capsule

232 diameter SD = 0.043). Egg capsule size remains constant throughout development (Figure S1). Slugs

233 began to deposit egg masses when they were an average of 17.5 days old. A total of 1958 egg masses

234 were laid by 433 slugs from 17 families. The number of egg masses an individual laid ranged widely  
235 (mean = 4.5, min = 0, max = 33). Most egg capsules within an egg mass were similar in size (mean = 136  
236  $\mu\text{m}$ , SD = 0.0097, and the two highest modes = 113  $\mu\text{m}$ , and 182  $\mu\text{m}$ ). Fewer egg masses were laid in low  
237 salinity than in high salinity (1037 versus 1809, respectively). Proportionally there were fewer  
238 lecithotrophic egg masses produced in low salinity (17.6%) than in high (25.7%). Mixed egg masses  
239 contain both large eggs (> 150  $\mu\text{m}$  capsule size) and small eggs (< 150  $\mu\text{m}$  capsule size). Mixed egg  
240 masses occurred in both high and low salinities at similar proportions (6.3% in low salinity, 6.7% in high  
241 salinity). There was an effect of collection site or collection month, with the slugs collected in Tomales  
242 bay in June producing significantly fewer lecithotrophically developing egg masses (5%) than either the  
243 Long Beach (24%) or Mill Valley (22%) populations, both of which were collected in September (Figure  
244 2A; linear model (egg capsule diameter  $\sim$  region + salinity + eggmass type), region p-value < 0.001,  
245 salinity p-value = 0.0215, eggmass type p-value < 0.001,  $r^2=0.76$ ).

246 The reaction norm of the proportion of lecithotrophic egg masses reveals considerable variation  
247 for egg-mass type within and between families (Figure 2A). Most families show an increase in egg  
248 capsule size and in the proportion of lecithotrophic eggs in high salinity, although four families produced  
249 more lecithotrophic egg masses in low salinity than in high (Figure 2A, showing proportion  
250 lecithotrophic). Five families produced lecithotrophic egg masses in high salinity, but not in low salinity  
251 (Figure 2A, B). Likewise, one family produced no lecithotrophic eggs in either salinity, but also had the  
252 lowest survival rate in lab conditions of any other family. Three of the four reaction norms with negative  
253 slopes had a small sample size ( $N < 10$ ). Offspring survival to adulthood was lower in low salinity than in  
254 high salinity (63% versus 81%, respectively). While survival declined in low salinity, survival was not  
255 significantly correlated with the proportion of lecithotrophy in either low or high salinity (linear model,  
256 low salinity  $r^2 = 0.001$ ,  $p = 0.89$ ; high salinity  $r^2 = 0.005$ ,  $p = 0.77$ ).

257

258 **Genetic correlations between environments**

259 The family response to salinity is positively correlated across salinity treatments (Figure 2B; slope = 0.63;  
260 Y-intercept = 0.001, multiple  $r^2 = 0.89$ , p-value  $7.13e-05$ ). This slope predicts the expected response to  
261 selection for developmental mode between high and low salinity: for every one-unit change in response  
262 to selection in high salinity, a corresponding 63% change should occur in low salinity.

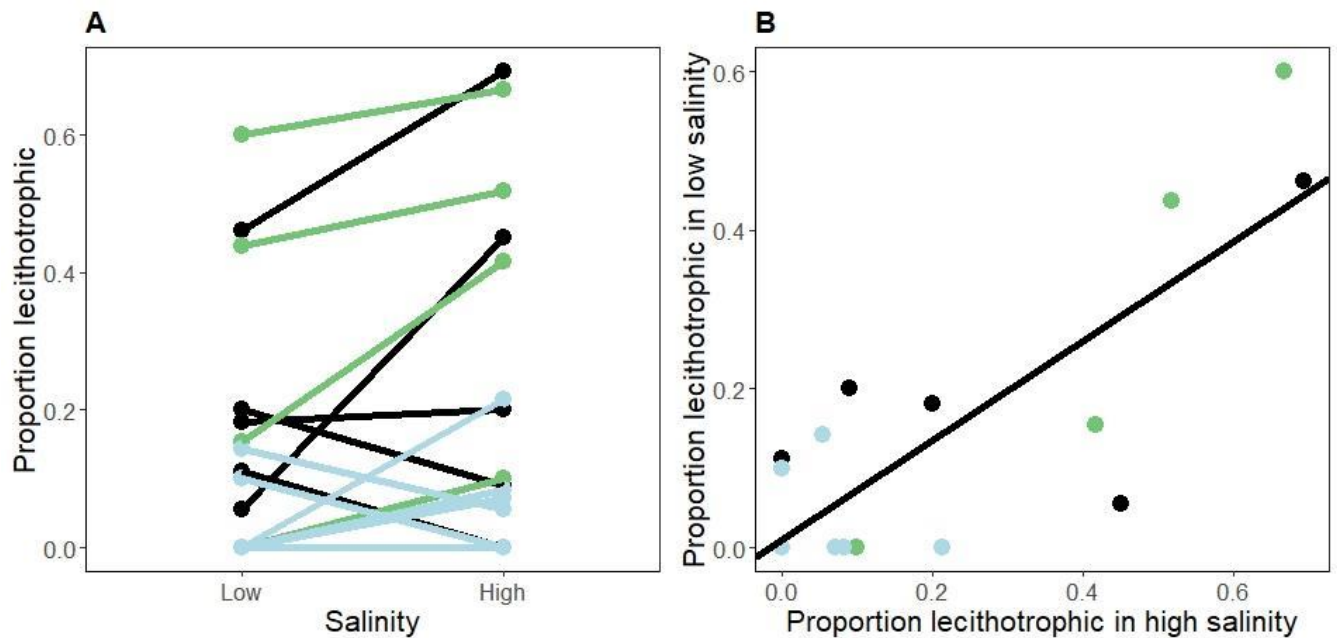

263  
264 **Figure 2.** A) Family reaction norm for the proportion of lecithotrophy in low (16 ppt) and high (32 ppt) salinity and  
265 (B) the correlation between families for the proportion of lecithotrophy produced in low and high salinity (slope =  
266 0.63, intercept = 0.001). Each line in A and each dot in B are a maternal family. Colors denote sampling sites:  
267 Tomales Bay, CA in green, Mill Valley, CA in light blue, and Long Beach, CA in black.

268

269 **Analysis of genetic variance and heritability**

270 The residuals for egg-capsule size against maternal family and salinity are bimodally distributed, as are  
271 the raw data (Figure S1). The analysis revealed a significant effect of salinity and family on egg-capsule  
272 size (MCMCglmm for Gaussian trait; salinity p-value = 0.004, maternal family p-value < 0.001). Broad  
273 sense heritability for egg capsule size was 0.54 (Table 1). The model testing the effect of salinity and  
274 maternal family on the proportion of lecithotrophic egg masses (the threshold model) also revealed a

275 significant effect of salinity and maternal family on developmental mode (salinity p-value = 0.000644,  
 276 maternal family p-value < 2e-05). Broad sense heritability on the observed scale was 0.23 and on the  
 277 latent scale was 0.46 (Table 1). For both models, I assessed model fit by confirming that the effective  
 278 sample size exceeded 1000, and the trace and density plots showed adequate mixing.  
 279

280 **Table 1.** Summary of model values and broad sense heritability where  $V_a$  is the additive genetic variance, and  $V_r$  is  
 281 the link variance as computed in each model and corresponds to phenotypic variance.

| trait              | distribution | $\mu$ | $V_a$   | $V_r$  | $H^2$ latent | $H^2$ obs.    |
|--------------------|--------------|-------|---------|--------|--------------|---------------|
| egg-capsule size   | gaussian     | 0.13  | 0.00088 | 0.0016 | NA           | <b>0.544</b>  |
| developmental mode | binary       | 0.73  | 0.19    | 0.05   | <b>0.456</b> | <b>0.2534</b> |

282

283

#### 284 Selection for lecithotrophy in low and high salinity

285 Selection for lecithotrophic egg masses across three generations resulted in a proportional  
 286 increase in the number of lecithotrophic egg masses in both low and high salinity (Figure 3, Table 2). As  
 287 the sample size for the low salinity  $S_2$  generation was very small (1 family line, 4 individuals) only the  $S_2$   
 288 generation for the high salinity treatment is shown (three family lines, 17 individuals). The response to  
 289 selection was similar for both low and high salinity selected lines, while the selection coefficient was  
 290 greater for the low salinity selected lines (Table S1). Selection increased the proportion of mixed egg  
 291 masses in both low and high salinities (Table 2, Figure 3). The summed realized heritability for egg  
 292 capsule size was 0.39 for high salinity and 0.34 for low salinity (Table 2). Similarly, for developmental  
 293 mode realized heritability was 0.35 for high salinity and 0.38 for low salinity (Table 2, Table S1). Changes  
 294 in the slope of the reaction norm following selection was tested with 349 individuals from 9 families  
 295 (Long Beach: n= 5, Mill Valley: n=4) selected in both low and high salinity. The slope of the reaction norm  
 296 remained positive following selection (Figure 4), and a linear model with the response proportion

297 lecithotrophy against the additive predictors salinity and generation was not statistically significant  
 298 (salinity p-value = 0.21, generation p-value 0.30,  $r^2$  0.12, p-value = 0.25).

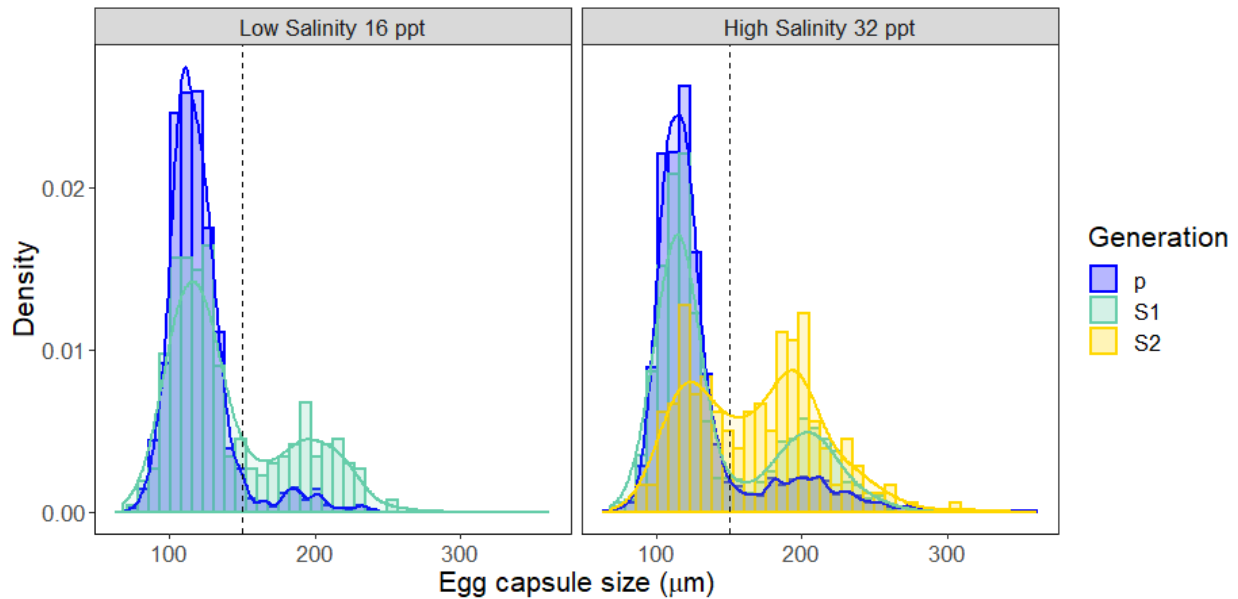

299  
 300 **Figure 3.** Barplot with density overlay showing the response to selection for lecithotrophy across several  
 301 generations in low (16 ppt) and high (32 ppt) salinity. The vertical dashed line indicates the cut-off for  
 302 lecithotrophic or planktotrophic development (egg capsule size 150  $\mu\text{m}$ ). Generations  $S_1$  and  $S_2$  are  
 303 ‘selfed’ (see Methods) while the parental generation is the product of outcrossing in the field. The  $S_2$   
 304 generation in low salinity is not shown due to small sample size (4 individuals from a single family, all of  
 305 which laid lecithotrophic egg masses).

306  
 307 **Table 2.** Selection for lecithotrophy in low (16 ppt) and high (32 ppt) salinity showing the mean egg  
 308 capsule size and the proportion of lecithotrophic egg masses (prop. l), proportion mixed egg masses  
 309 (prop. m), and their realized heritabilities. N is the number of individuals that survived to lay eggs. The  
 310 number of maternal family lines is parenthetical to the number of individuals. The data for the parental  
 311 generation is pooled from two separate experiments.

| Generation     | N (Family) | Low Salinity     |             |     | High Salinity |                  |             |     |
|----------------|------------|------------------|-------------|-----|---------------|------------------|-------------|-----|
|                |            | mean ( $\pm$ SD) | % L         | % M | N (Family)    | mean ( $\pm$ SD) | % L         | % M |
| P              | 189 (17)   | 0.13 (0.029)     | 10%         | 6%  | 244 (17)      | 0.13 (0.039)     | 19%         | 7%  |
| $S_1$          | 34 (2)     | 0.14 (0.040)     | 28%         | 11% | 68 (4)        | 0.15 (0.045)     | 32%         | 6%  |
| $S_2$          |            |                  |             |     | 17 (2)        | 0.17 (0.043)     | 51%         | 18% |
| Realized $h^2$ |            | <b>0.34</b>      | <b>0.38</b> |     |               | <b>0.39</b>      | <b>0.35</b> |     |

312



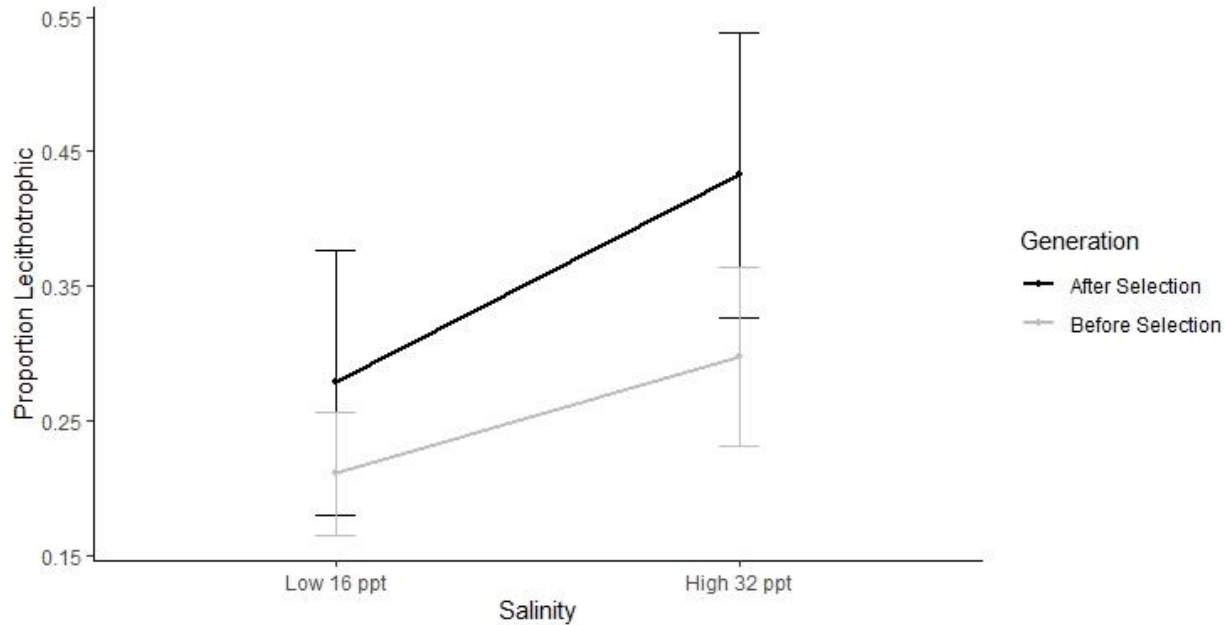

313

314 **Figure 4.** The reaction norm before and after one generation of selection for lecithotrophy. Note that this is a  
315 subset of the data (9 Families, 5 Long Beach, 4 Mill Valley) presented in Table 2 as not all families laid enough egg-  
316 masses to be split into low and high salinity following selection (See methods and results).

317

## 318 Discussion

319 The sacoglossan sea slug *Alderia willowi* exhibits variation in egg size leading to two  
320 developmental modes, lecithotrophy and planktotrophy, with differing developmental durations and  
321 dispersal potentials. Previous studies have shown that in *A. willowi* intraspecific variation in  
322 developmental mode (poecilogony) is a seasonal polyphenism modulated by the environment  
323 experienced by juvenile slugs (Krug et al. 2012). This study confirms experimentally that variation in the  
324 production of planktotrophic vs. lecithotrophic offspring is at least partly conditional on ambient salinity,  
325 but that the response varies across families, indicating a strong genotype by environment interaction.  
326 Developmental mode in *A. willowi* responds readily to selection for increased proportions of  
327 lecithotrophy. The response to selection implies sufficient genetic variation for developmental mode  
328 and has implications on both the phylogenetic rarity of poecilogony as well as the maintenance of



329 plasticity in *A. willowi* as slug populations appear capable of quickly responding to seasonally shifting  
330 environmental conditions.

331 Salinity is a common stressor for estuarine animals that varies seasonally in California (Cloern et  
332 al. 2017). Most maternal families of *A. willowi* responded to low salinity by producing more  
333 planktotrophic offspring, mirroring the pattern found in natural populations during the winter months  
334 when seasonal rain lowers mean and minimum salinity and proportions of planktotrophic egg masses  
335 increase (Patrick J. Krug, Gordon, and Romero 2012). These results suggest salinity is a cue for the type  
336 of egg mass to lay as well as a source of stress, as low salinity led to reduced survival, particularly in self-  
337 fertilized sibships (see Table 2). Seasonally fluctuating selection pressures are well documented in  
338 several taxa and represent challenging conditions to which non-migratory organisms must adapt  
339 through plasticity or, for organisms with short generation times, through changes in allele frequency, or  
340 via a combination of plasticity and allele frequency change (Bergland et al. 2014; Jones and Robinson  
341 2018; Kingsolver and Buckley 2017).

342 Plasticity for developmental mode is exceptionally rare and has only been documented in *A.*  
343 *willowi* (Krug et al. 2007) allowing for the examination of environmental as well as genetic factors that  
344 influence the evolution of developmental mode. Studies of poecilogonous species have been critical to  
345 furthering our understanding of developmental mode evolution (Levin et al. 1991, Zakas and Wares  
346 2012, Zakas and Rockman 2014). In particular, genetic crosses between individuals with lecithotrophic  
347 and planktotrophic development in the poecilogonous polychaete annelid *Streblospio benedicti* have  
348 revealed that developmental mode is highly modular with several large-effect loci that influence  
349 maternally determined egg size and other loci that act independently to determine larval morphology  
350 (e.g., chaeta length, Zakas et al. 2018). Yet in sacoglossan sea slugs, egg size variation appears to be due  
351 to many small effect loci, as shown by crosses between lecithotrophic and planktotrophic individuals in  
352 the poecilogonous sea slug *Elysia chlorotica* (West H.H, Harrigan J.F., Pierce S.K. 1984) and the results

353 presented herein for *Alderia willowi* with the addition of environmental sensitivity. In both annelids and  
354 sacoglossan there is support for a step-wise model of the evolution of developmental mode, but based  
355 on the handful of species to be thoroughly examined they vary in the number of loci and their effect  
356 size. These differing patterns of inheritance between annelids and mollusks suggest that alternate  
357 genetic pathways have contributed to developmental mode between these two phyla. Additional case  
358 studies that perform genetic crosses, QTL mapping, and genomic or transcriptomic sequencing would  
359 determine whether these genetic pathways are novel or shared between genera or phyla.

360 **Supplemental tables and figures**

361

362 **Table S1.** Parameters for realized heritability in low and high salinity for egg capsule size and the

363 proportion of lecithotrophy. Where q is the proportion of lecithotrophy pre-selection when applicable,  $\mu$

364 is the mean trait value, S is the selection coefficient, R is the response, and  $H^2$  is the broad sense

365 heritability. Sum  $H^2$  is calculated by dividing the summed responses by the summed selection

366 coefficients for each trait and salinity separately.

| Proportion<br>Lecithotrophic |      | Low salinity |      |      |       | High salinity |       |      |       |       |
|------------------------------|------|--------------|------|------|-------|---------------|-------|------|-------|-------|
| Generation                   | q    | u            | s    | R    | $H^2$ | q             | u     | S    | R     | $H^2$ |
| P                            | 0.10 | -1.28        | 1.75 | 0.70 | 0.40  | 0.19          | -0.88 | 1.43 | 0.41  | 0.29  |
| S1                           | 0.28 | -0.55        |      |      |       | 0.32          | -0.47 | 1.12 | 0.49  | 0.44  |
| S2                           |      |              |      |      |       | 0.51          | 0.03  |      |       |       |
| sum $H^2$                    |      |              |      |      |       |               |       |      |       | 0.35  |
| Egg capsule size             |      |              |      |      |       |               |       |      |       |       |
| Generation                   |      | u            | S    | R    | $H^2$ | u             | S     | R    | $H^2$ |       |
| P                            |      | 0.13         | 0.06 | 0.02 | 0.34  | 0.13          | 0.05  | 0.01 | 0.24  |       |
| S1                           |      | 0.14         |      |      |       | 0.15          | 0.03  | 0.02 | 0.63  |       |
| S2                           |      |              |      |      |       | 0.17          |       |      |       |       |
| sum $H^2$                    |      |              |      |      |       |               |       |      |       | 0.39  |

367

368

369

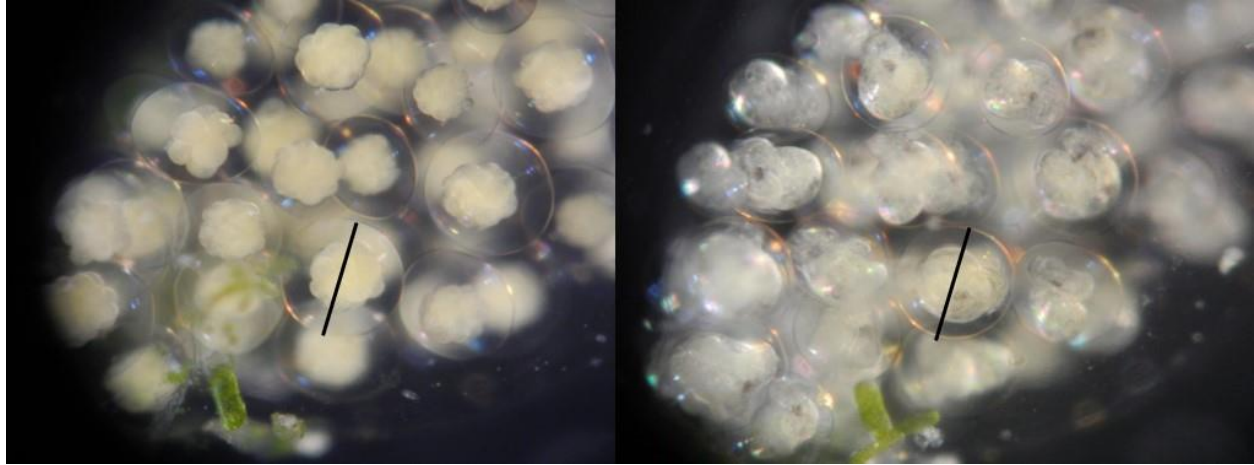

370

371 **Figure S1.** Egg capsule size remains constant across larval development as seen in these figures showing  
372 the same embryo at the 32-64 cell stage and 4 days later at the veliger stage. At each time the egg  
373 capsule was measured to be 206  $\mu\text{m}$ .

374

375

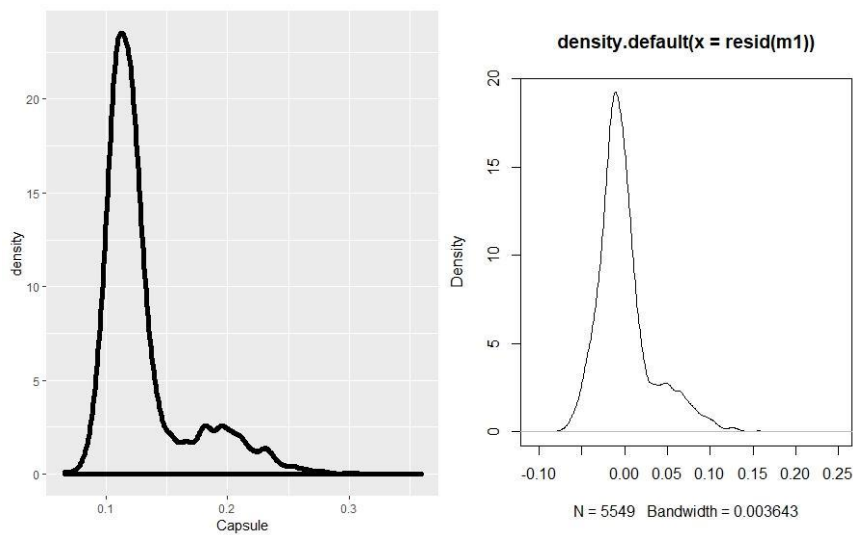

376

377 **Figure S2.** Non-normality of raw data (egg capsule size) and residual in a linear model where egg capsule  
378 size is the response and Family and Salinity are the predictors. Normality can be achieved in the  
379 residuals if developmental mode (lecithotrophy versus planktotrophy) based on an egg capsule size  
380 cutoff of 150  $\mu\text{m}$  is used.

381 **References**

- 382  
383 **Allen J.D., Pernet B. 2007. Intermediate modes of larval development: bridging the gap between**  
384 **planktotrophy and lecithotrophy. *Evolution & Development* 9:643–653.**
- 385 **Bergland, Alan O., Emily L. Behrman, Katherine R. O’Brien, Paul S. Schmidt, and Dmitri A. Petrov. 2014.**  
386 **“Genomic Evidence of Rapid and Stable Adaptive Oscillations over Seasonal Time Scales in**  
387 ***Drosophila*.” *PLoS Genetics* 10 (11): e1004775.**
- 388 **Botello, Gilberto, and Patrick J. Krug. 2006. “‘Desperate Larvae’ Revisited: Age, Energy and Experience**  
389 **Affect Sensitivity to Settlement Cues in Larvae of the Gastropod *Alderia* Sp.” *Vol. 312*: 149–59.**
- 390 **Cloern, J. E., Jassby, A. D., Schraga, T. S., Nejad, E., & Martin, C. 2017. Ecosystem variability along the**  
391 **estuarine salinity gradient: Examples from long-term study of San Francisco Bay. *Limnology and***  
392 ***Oceanography*, 62(S1), S272–S291. <https://doi.org/10.1002/lno.10537>**
- 393 **Collin, Rachel. 2012. “Nontraditional Life-History Choices: What Can ‘Intermediates’ Tell Us about**  
394 **Evolutionary Transitions between Modes of Invertebrate Development?” *Integrative and***  
395 ***Comparative Biology* 52 (1): 128–37.**
- 396 **Collin, Rachel, and Maria Pia Miglietta. 2008. “Reversing Opinions on Dollo’s Law.” *Trends in Ecology***  
397 ***& Evolution* 23 (11): 602–9.**
- 398 **Collin, Rachel and Moran, Amy. 2018. “[Evolutionary Transitions in Mode of Development](#).” in**  
399 ***Evolutionary Ecology of Marine Invertebrate Larvae*, edited by Carrier, Tyler J., Reitzel, Adam**  
400 **M., and Heyland, Andreas., 50–66. Oxford University Press.**
- 401 **Ellingson, Ryan A., and Patrick J. Krug. 2016. “Reduced Genetic Diversity and Increased Reproductive**  
402 **Isolation Follow Population-Level Loss of Larval Dispersal in a Marine Gastropod.” *Evolution;***  
403 ***International Journal of Organic Evolution* 70 (1): 18–37.**
- 404 **Falconer, Douglas Scott, and Others. 1960. “Introduction to Quantitative Genetics.” *Introduction to***  
405 ***Quantitative Genetics*. <https://www.cabdirect.org/cabdirect/abstract/19601603365>.**
- 406 **Fuller, Rebecca C., Charles F. Baer, and Joseph Travis. 2005. “How and When Selection Experiments**  
407 **Might Actually Be Useful.” *Integrative and Comparative Biology* 45 (3): 391–404.**
- 408 **Garchow M. 2010. Population Dynamics at The Range Boundary Between Sister Species of The**  
409 **Estuarine Sea Slug Genus *Alderia*: Role of The Physical Environment Versus Larval Supply. CSU**  
410 **LA. Unpublished masters thesis. Advisor: P. Krug**
- 411 **Hadfield, Jarrod D., and Others. 2010. “MCMC Methods for Multi-Response Generalized Linear Mixed**  
412 **Models: The MCMCglmm R Package.” *Journal of Statistical Software* 33 (2): 1–22.**
- 413 **Jeffery, Charlotte H., Richard B. Emlet, and D. T. J. Littlewood. 2003. “Phylogeny and Evolution of**  
414 **Developmental Mode in Temnopleurid Echinoids.” *Molecular Phylogenetics and Evolution* 28 (1):**  
415 **99–118.**
- 416 **Jones, Beryl M., and Gene E. Robinson. 2018. “Genetic Accommodation and the Role of Ancestral**  
417 **Plasticity in the Evolution of Insect Eusociality.” *The Journal of Experimental Biology* 221 (Pt 23).**  
418 **<https://doi.org/10.1242/jeb.153163>.**
- 419 **Kingsolver, Joel G., and Lauren B. Buckley. 2017. “Evolution of Plasticity and Adaptive Responses to**  
420 **Climate Change along Climate Gradients.” *Proceedings. Biological Sciences / The Royal Society***  
421 **284 (1860). <https://doi.org/10.1098/rspb.2017.0386>.**
- 422 **Knott, K. Emily, and Damhnait McHugh. 2012. “Introduction to Symposium: Poecilogony—A Window**  
423 **on Larval Evolutionary Transitions in Marine Invertebrates.” *Integrative and Comparative***  
424 ***Biology* 52 (1): 120–27.**
- 425 **Krug, Patrick J. 2007. “Poecilogony and Larval Ecology in the Gastropod Genus *Alderia*\*.” *American***  
426 ***Malacological Bulletin* 23 (1): 99–111.**
- 427 **Krug, Patrick J., Ryan A. Ellingson, Ron Burton, and Ángel Valdés. 2007. “A New Poecilogonous Species**

- 428 of Sea Slug (Opisthobranchia: Sacoglossa) from California: Comparison with the Planktotrophic  
429 Congener *Alderia Modesta* (Lovén, 1844)." *The Journal of Molluscan Studies* 73 (1): 29–38.
- 430 Krug, Patrick J., Dominique Gordon, and Melissa R. Romero. 2012. "Seasonal Polyphenism in Larval  
431 Type: Rearing Environment Influences the Development Mode Expressed by Adults in the Sea  
432 Slug *Alderia Willowi*." *Integrative and Comparative Biology* 52 (1): 161–72.
- 433 Krug, Patrick J., Jann E. Vendetti, Ryan A. Ellingson, Cynthia D. Trowbridge, Yayoi M. Hirano, Danielle  
434 Y. Trathen, Albert K. Rodriguez, Cornelis Swennen, Nerida G. Wilson, and Ángel A. Valdés. 2015.  
435 "Species Selection Favors Dispersive Life Histories in Sea Slugs, but Higher Per-Offspring  
436 Investment Drives Shifts to Short-Lived Larvae." *Systematic Biology* 64 (6): 983–99.
- 437 Krug, P. J. 1998. "Poecilogony in an Estuarine Opisthobranch: Planktotrophy, Lecithotrophy, and  
438 Mixed Clutches in a Population of the Ascoglossan *Alderia Modesta*." *Marine Biology*.  
439 <https://doi.org/10.1007/s002270050414>.
- 440 ——. 2001. "Bet-Hedging Dispersal Strategy of a Specialist Marine Herbivore: A Settlement  
441 Dimorphism among Sibling Larvae of *Alderia Modesta*." *Marine Ecology Progress Series*.  
442 <https://doi.org/10.3354/meps213177>.
- 443 Kupriyanova, Elena K., Tara A. Macdonald, and Greg W. Rouse. 2006. "Phylogenetic Relationships  
444 within Serpulidae (Sabellida, Annelida) Inferred from Molecular and Morphological Data."  
445 *Zoologica Scripta* 35 (5): 421–39.
- 446 Levin, Lisa A., Jun Zhu, and Elizabeth Creed. 1991. "The Genetic Basis of Life-History Characters in a  
447 Polychaete Exhibiting Planktotrophy and Lecithotrophy." *Evolution*.  
448 <https://doi.org/10.2307/2409672>.
- 449 Marshall, C. R., E. C. Raff, and R. A. Raff. 1994. "Dollo's Law and the Death and Resurrection of Genes."  
450 *Proceedings of the National Academy of Sciences of the United States of America* 91 (25): 12283–  
451 87.
- 452 Marshall, D., McAlister, J., and A. Reitzel. 2017. Evolutionary Ecology of Parental Investment and  
453 Larval Diversity in *Evolutionary Ecology of Marine Invertebrate Larvae*, edited by Carrier,  
454 Tyler J., Reitzel, Adam M., and Heyland, Andreas., 34-49. Oxford University Press
- 455 McDonald, Kathryn A., Rachel Collin, and Maryna P. Lesoway. 2014. "Poecilogony in the  
456 Caenogastropod *Calyptraea Lichen* (Mollusca: Gastropoda)." *Invertebrate Biology: A Quarterly  
457 Journal of the American Microscopical Society and the Division of Invertebrate Zoology/ASZ* 133  
458 (3): 213–20.
- 459 McEdward, Larry R., and Daniel A. Janies. 1997. "Relationships among Development, Ecology, and  
460 Morphology in the Evolution of Echinoderm Larvae and Life Cycles." *Biological Journal of the  
461 Linnean Society. Linnean Society of London* 60 (3): 381–400.
- 462 McHugh, D., and G. W. Rouse. 1998. "Life History Evolution of Marine Invertebrates: New Views from  
463 Phylogenetic Systematics." *Trends in Ecology & Evolution* 13 (5): 182–86.
- 464 Oyarzun, Fernanda X., and Antonio Brante. 2015. "A New Case of Poecilogony from South America  
465 and the Implications of Nurse Eggs, Capsule Structure, and Maternal Brooding Behavior on the  
466 Development of Different Larval Types." *The Biological Bulletin* 228 (2): 85–97.
- 467 Paaby, Annalise B., and Matthew V. Rockman. 2014. "Cryptic Genetic Variation: Evolution's Hidden  
468 Substrate." *Nature Reviews Genetics*. <https://doi.org/10.1038/nrg3688>.
- 469 Pfennig, David W., Matthew A. Wund, Emilie C. Snell-Rood, Tami Cruickshank, Carl D. Schlichting, and  
470 Armin P. Moczek. 2010. "Phenotypic Plasticity's Impacts on Diversification and Speciation."  
471 *Trends in Ecology & Evolution* 25 (8): 459–67.
- 472 Puritz, Jonathan B., Carson C. Keever, Jason A. Addison, Maria Byrne, Michael W. Hart, Richard K.  
473 Grosberg, and Robert J. Toonen. 2012. "Extraordinarily Rapid Life-History Divergence between  
474 *Cryptasterina* Sea Star Species." *Proceedings. Biological Sciences / The Royal Society* 279 (1744):  
475 3914–22.



- 476 Roff, Derek A. 1996. "The Evolution of Threshold Traits in Animals." *The Quarterly Review of Biology*  
477 71 (1): 3–35.
- 478 Ruppert, Edward E. 2004. *Invertebrate Zoology: A Functional Evolutionary Approach*. Thomson-  
479 Brooks/Cole.
- 480 Scheiner, S. M. 2002. "Selection Experiments and the Study of Phenotypic Plasticity 1." *Journal of*  
481 *Evolutionary Biology* 15 (6): 889–98.
- 482 Smolensky, Nicole, Melissa R. Romero, and Patrick J. Krug. 2009. "Evidence for Costs of Mating and  
483 Self-Fertilization in a Simultaneous Hermaphrodite with Hypodermic Insemination, the  
484 Opisthobranch *Alderia Willowi*." *The Biological Bulletin* 216 (2): 188–99.
- 485 Strathmann, Richard R. 1978. "THE EVOLUTION AND LOSS OF FEEDING LARVAL STAGES OF MARINE  
486 INVERTEBRATES." *Evolution; International Journal of Organic Evolution* 32 (4): 894–906.
- 487 Thorson, G. 1950. "Reproductive and Larval Ecology of Marine Bottom Invertebrates." *Biological*  
488 *Reviews of the Cambridge Philosophical Society* 25 (1): 1–45.
- 489 Via, Sara. 1984. "THE QUANTITATIVE GENETICS OF POLYPHAGY IN AN INSECT HERBIVORE. II. GENETIC  
490 CORRELATIONS IN LARVAL PERFORMANCE WITHIN AND AMONG HOST PLANTS." *Evolution;*  
491 *International Journal of Organic Evolution* 38 (4): 896–905.
- 492 Villemereuil, Pierre de. 2012. "Estimation of a Biological Trait Heritability Using the Animal Model."  
493 *How to Use the MCMCglmm R Package*.  
494 [https://www.researchgate.net/profile/Pierre\\_De\\_Villemereuil/publication/257729224\\_Tutorial](https://www.researchgate.net/profile/Pierre_De_Villemereuil/publication/257729224_Tutorial_Estimation_of_a_biological_trait_heritability_using_the_animal_model_How_to_use_the_MC_MCMCglmm_R_package/links/0c960525c32aaa92e3000000/Tutorial-Estimation-of-a-biological-trait-heritability-using-the-animal-model-How-to-use-the-MCMCglmm-R-package.pdf)  
495 [\\_Estimation\\_of\\_a\\_biological\\_trait\\_heritability\\_using\\_the\\_animal\\_model\\_How\\_to\\_use\\_the\\_MC](https://www.researchgate.net/profile/Pierre_De_Villemereuil/publication/257729224_Tutorial_Estimation_of_a_biological_trait_heritability_using_the_animal_model_How_to_use_the_MC_MCMCglmm_R_package/links/0c960525c32aaa92e3000000/Tutorial-Estimation-of-a-biological-trait-heritability-using-the-animal-model-How-to-use-the-MCMCglmm-R-package.pdf)  
496 [MCglmm\\_R\\_package/links/0c960525c32aaa92e3000000/Tutorial-Estimation-of-a-biological-](https://www.researchgate.net/profile/Pierre_De_Villemereuil/publication/257729224_Tutorial_Estimation_of_a_biological_trait_heritability_using_the_animal_model_How_to_use_the_MC_MCMCglmm_R_package/links/0c960525c32aaa92e3000000/Tutorial-Estimation-of-a-biological-trait-heritability-using-the-animal-model-How-to-use-the-MCMCglmm-R-package.pdf)  
497 [trait-heritability-using-the-animal-model-How-to-use-the-MCMCglmm-R-package.pdf](https://www.researchgate.net/profile/Pierre_De_Villemereuil/publication/257729224_Tutorial_Estimation_of_a_biological_trait_heritability_using_the_animal_model_How_to_use_the_MC_MCMCglmm_R_package/links/0c960525c32aaa92e3000000/Tutorial-Estimation-of-a-biological-trait-heritability-using-the-animal-model-How-to-use-the-MCMCglmm-R-package.pdf).
- 498 ———. 2018. "Quantitative Genetic Methods Depending on the Nature of the Phenotypic Trait."  
499 *Annals of the New York Academy of Sciences* 1422 (1): 29–47.
- 500 Walsh, Bruce, and Michael Lynch. 2018. *Evolution and Selection of Quantitative Traits*. Oxford  
501 University Press.
- 502 West H.H, Harrigan J.F., Pierce S.K. 1984. "Hybridization of Two Populations of a Marine  
503 Opisthobranch with Different Developmental Patterns." *The Veliger* 26 (3): 199–206.
- 504 Zakas, C., Jennifer M. Deutscher, Alex D. Kay, and Matthew V. Rockman. 2018. "Decoupled Maternal  
505 and Zygotic Genetic Effects Shape the Evolution of Development." *eLife* 7 (September).  
506 <https://doi.org/10.7554/eLife.37143>.
- 507 Zakas C., Rockman M.V. 2014. Dimorphic development in *Streblospio benedicti*: genetic analysis of  
508 morphological differences between larval types. *The International Journal of Developmental*  
509 *Biology* 58:593–599.
- 510 Zakas C, Wares JP. Consequences of a poecilogonous life history for genetic structure in coastal  
511 populations of the polychaete *Streblospio benedicti*. *Mol Ecol.* 2012;21(22):5447–60.
- 512
